# Supplementary material for: Tacrolimus reverses pemphigus vulgaris serum-enhanced expression of desmoglein in HaCaT cells via inhibition of heat shock protein-27 phosphorylation
Source: Research Square preprint supplement (doi:10.21203/rs.3.rs-2307010/v2), 2023-03-15

# Sup figure1

PV Time (h) 0 0.5 1 2 4 6 24

Dsg3

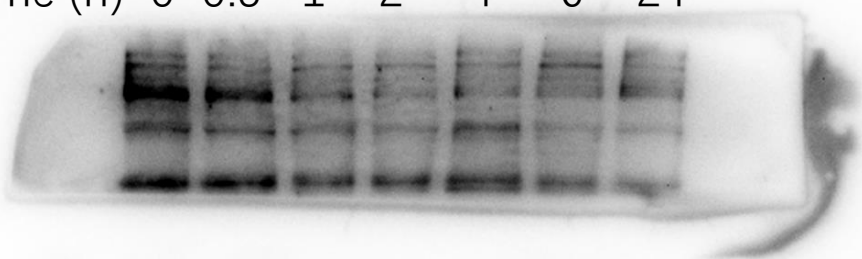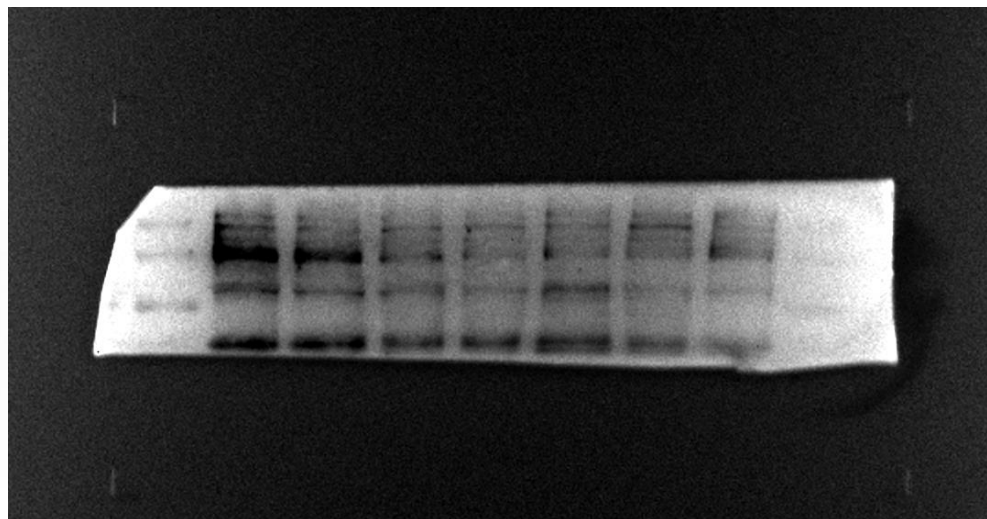

Time (h) 0 0.5 1 2 4 6 24

GAPDH

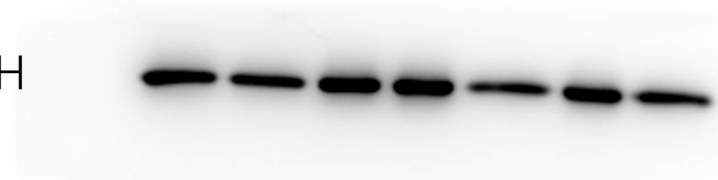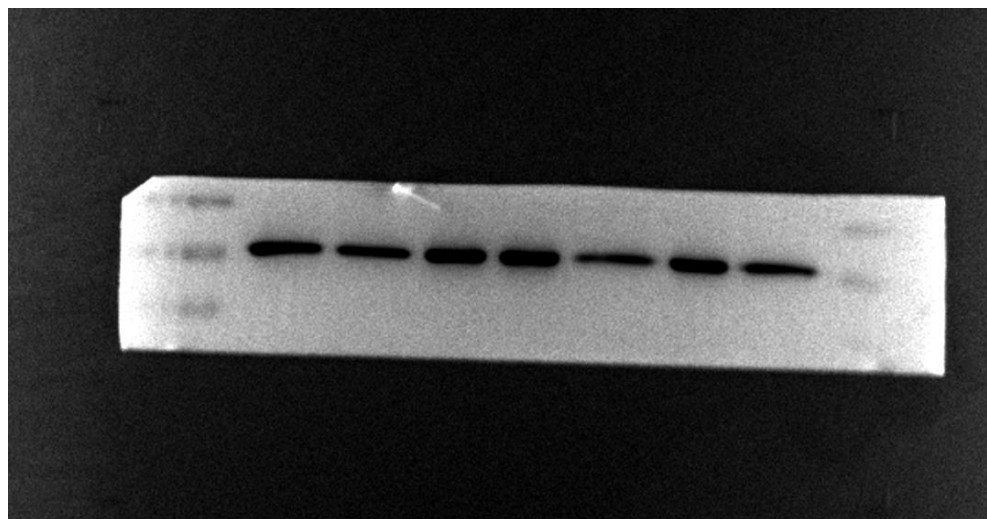

## Sup Figure2

Three different HSP27 siRNAs were used, namely HSP27 siRNA-1, HSP27 siRNA-2 and HSP27 siRNA-3, and HSP27 siRNA-1 was selected according to the experimental results

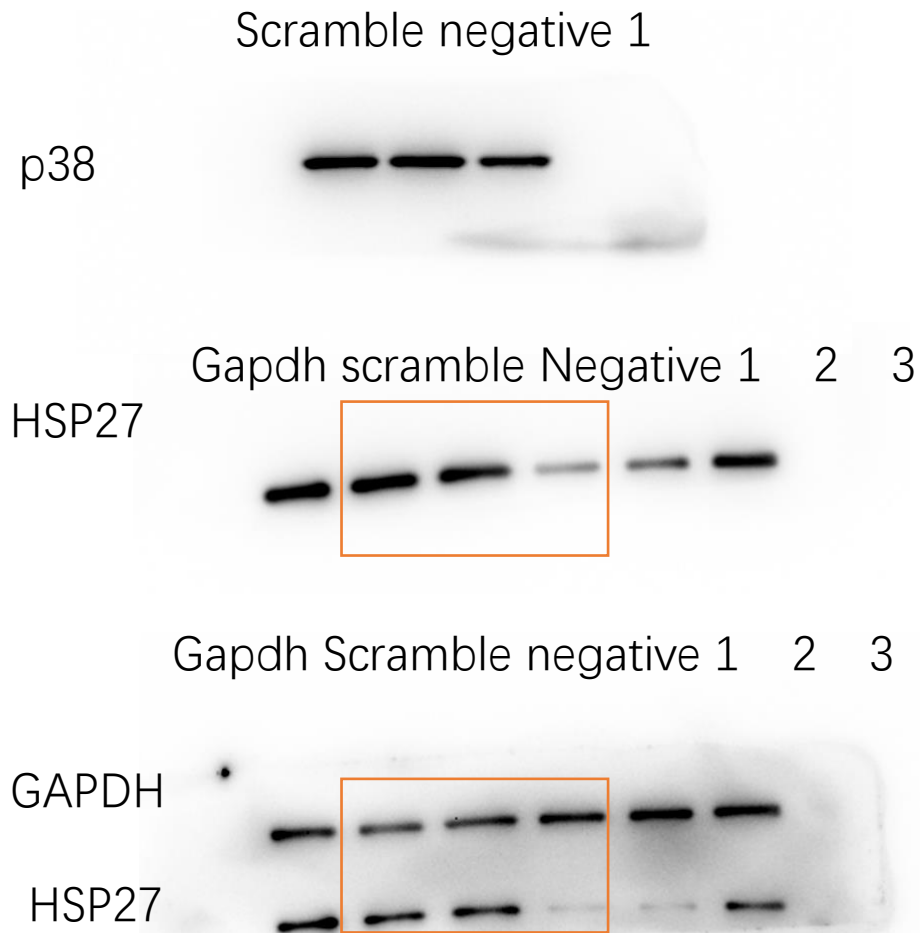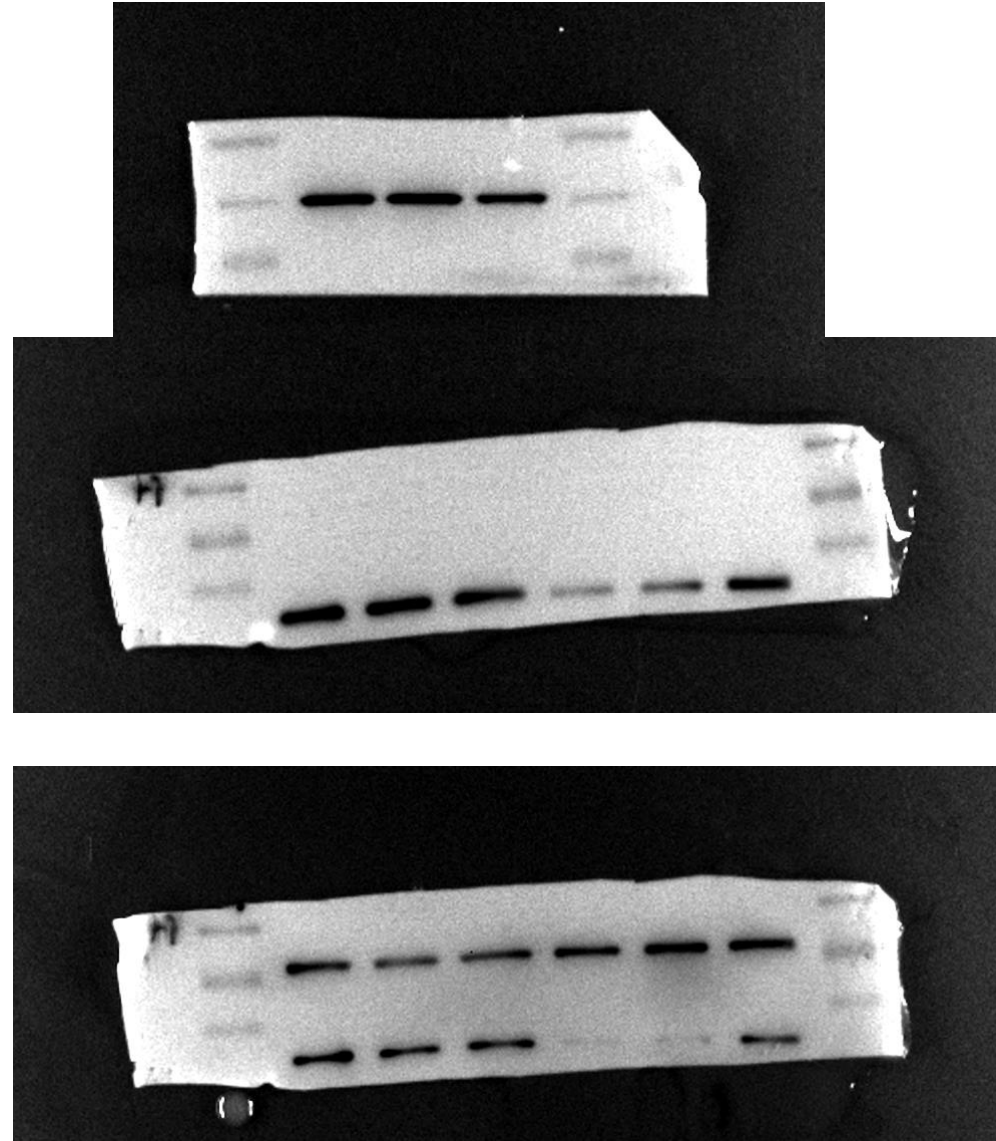

# Sup figure3

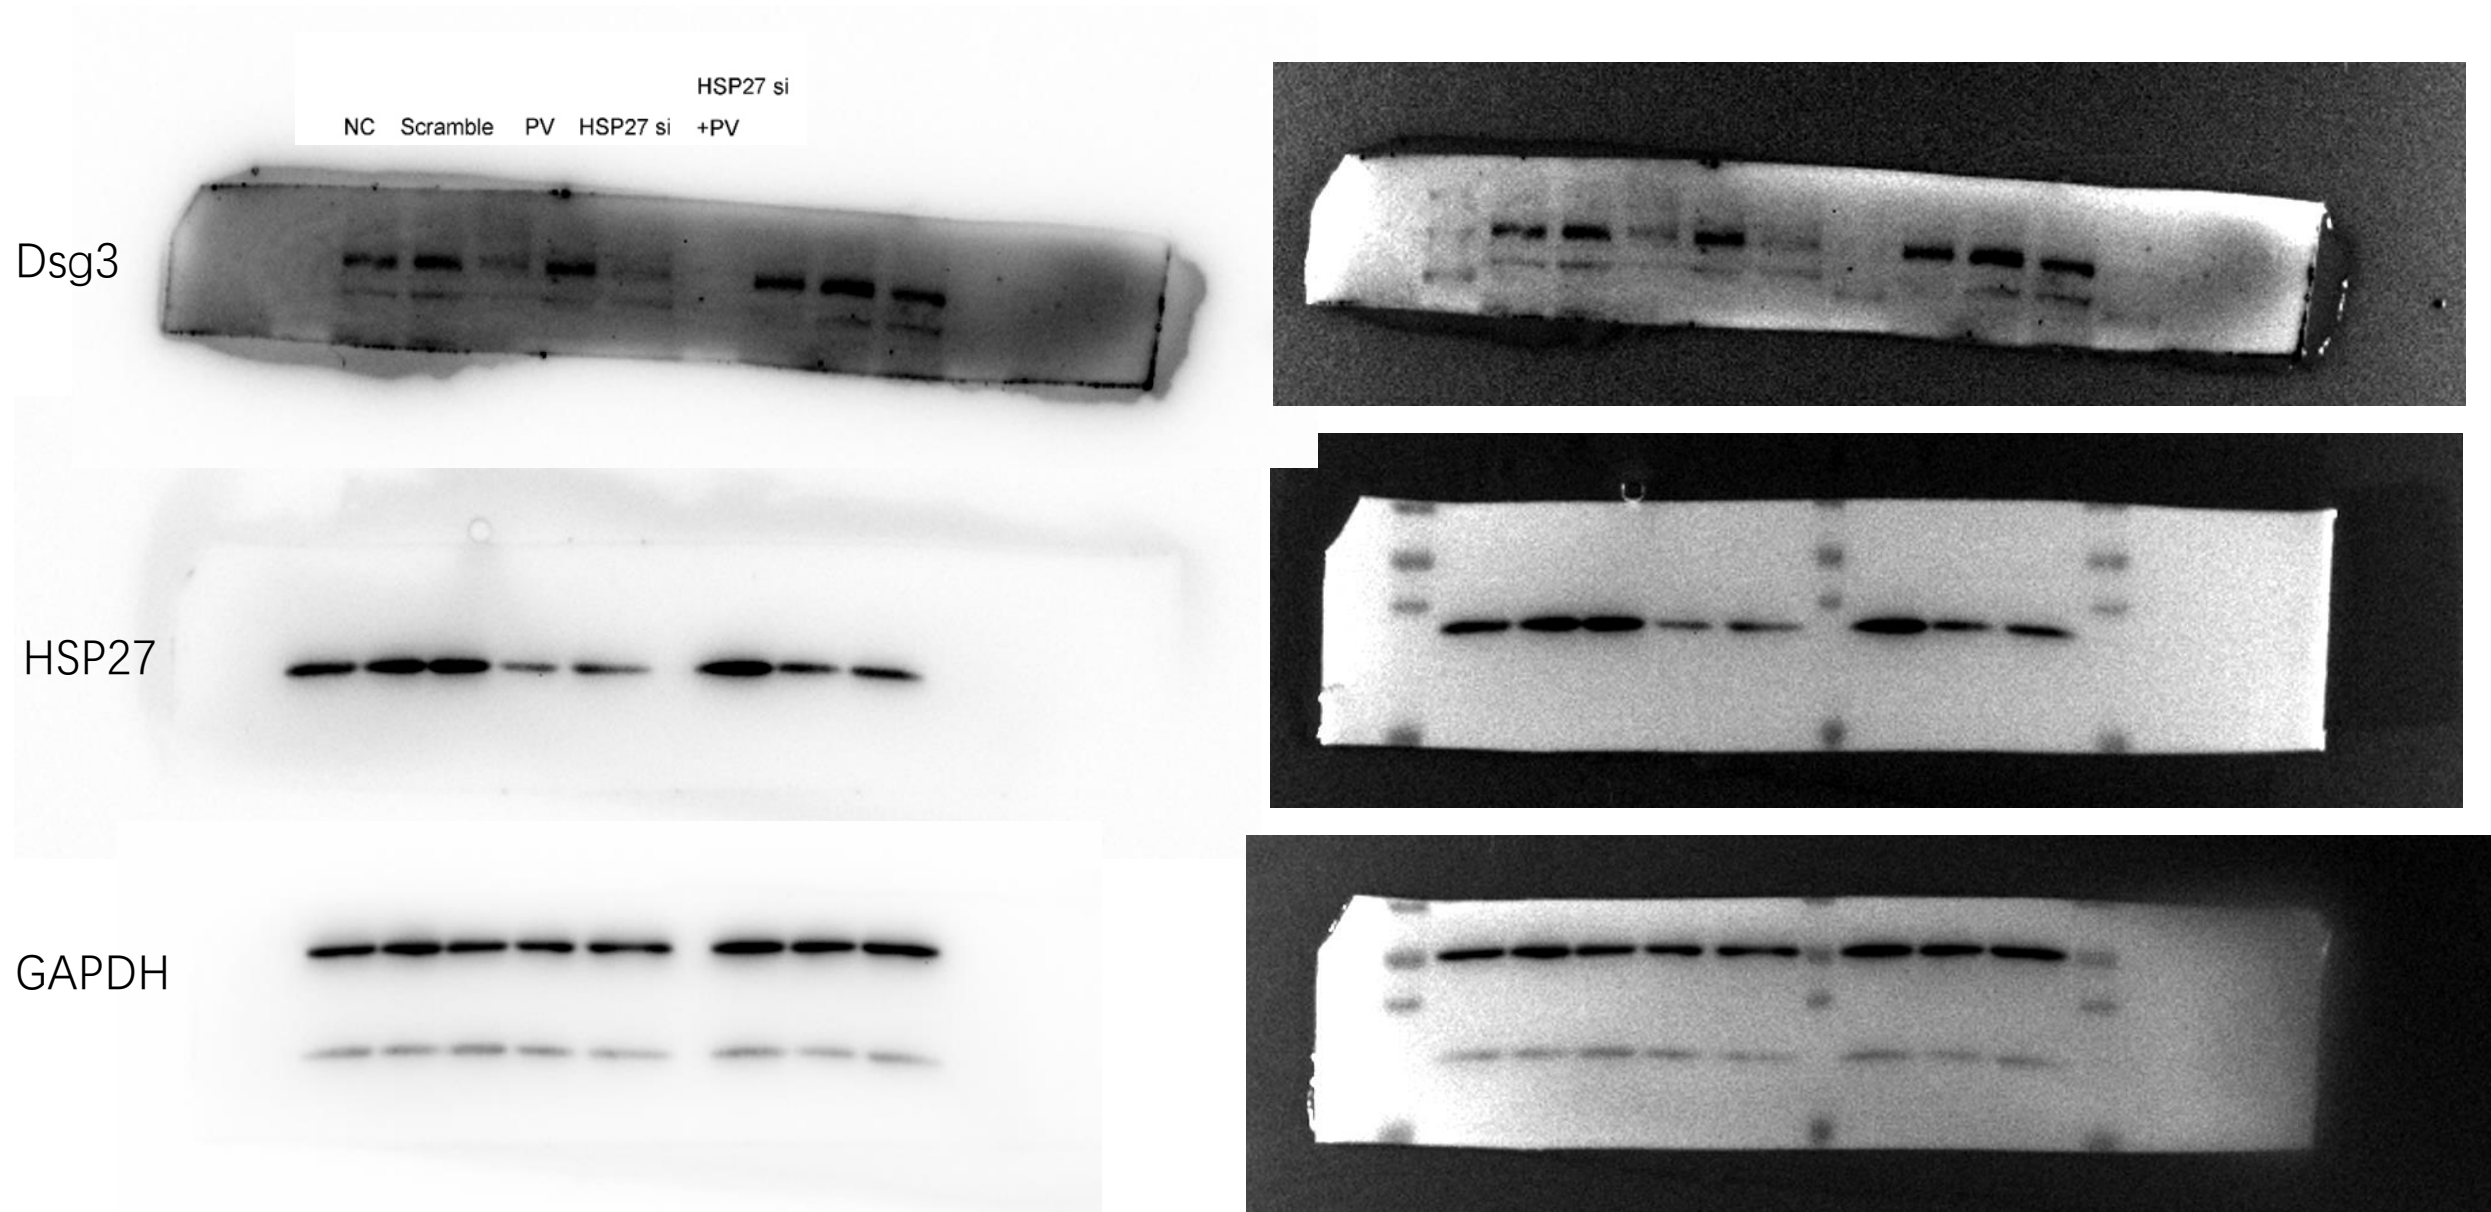

Supplement: Supplementary file 1 [file e500954d8146aca5b1245c7d.pdf]
